# Supplementary material for: Anterior cleft palate due to Cbfb deficiency and its rescue by folic acid
Source: PubMed Central journal article supplement (PMC6602316; doi:10.1242/dmm.038851), 2019-06-27
Supplement: dmm-12-038851-s1.pdf [file dmm-12-038851-s1.pdf]

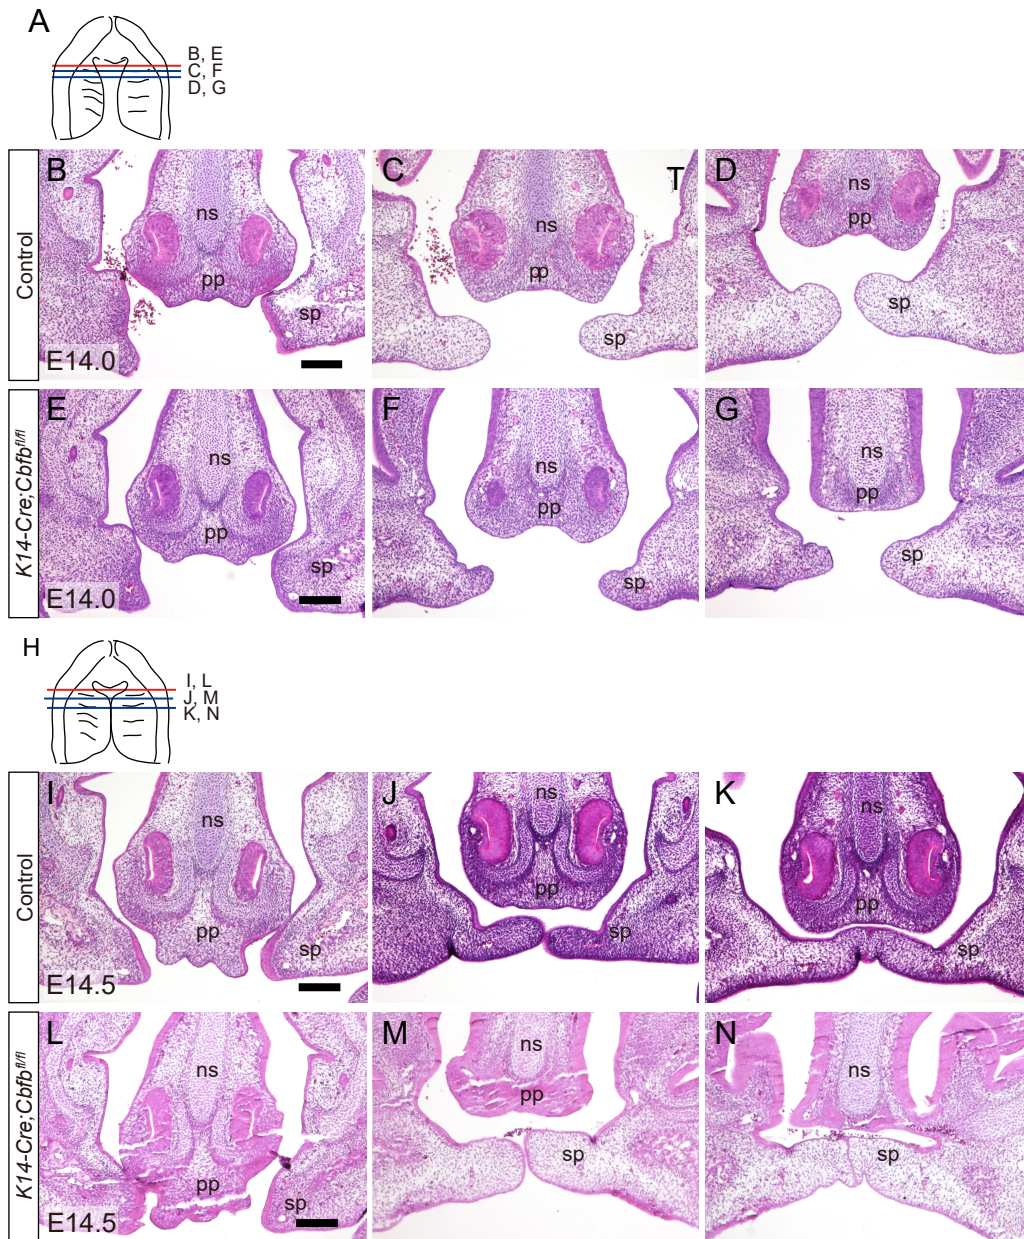

**Figure S1. Sequential frontal sections at E14.0 and E14.5.**

(A,H) The diagram shows the occlusal view of the palate and the section positions as indicated by the lines. (B-G, I-N) Histological frontal sections at E14.0 (B-G) and E15.0 (I-N) of *Cbfb* mutant and control mice. Palatal phenotypes were not evident in these stages. Scale bar: 200 μm.



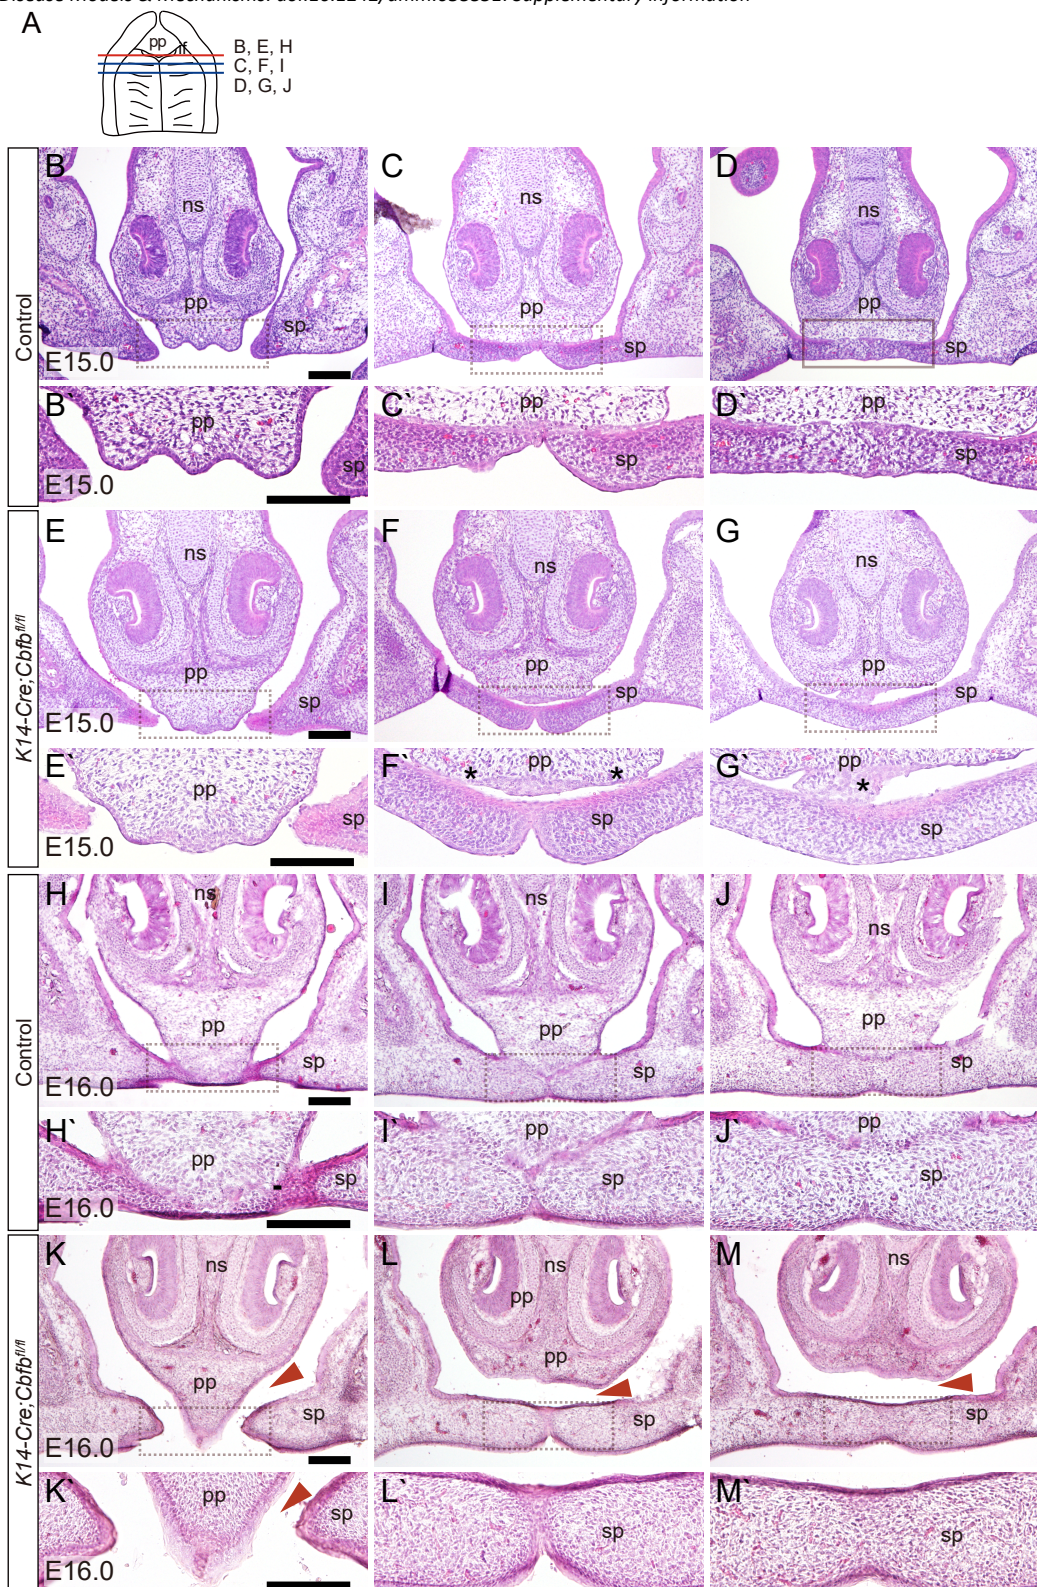

**Figure S2. Sequential frontal sections at E15.0 and E16.0.**

(A) The diagram shows the occlusal view of the palate and the section positions as indicated by the lines. (B-M) Histological frontal sections at E14.0 (B-G) and E15.0 (H-M) of *Cbfb* mutant and control mice. (B'-M') Higher magnification views (inset of panel B -M). Arrowheads (K,L,M) indicate the failure of fusion. Asterisks (F',G') indicate the contact between the primary and the secondary palates.
